# Supplementary material for: A Ni-containing decaniobate incorporating organic ligands: synthesis, structure, and catalysis for allylic alcohol epoxidation
Source: Royal Society of Chemistry journal article supplement (doi:10.1039/c7ra03254d), 2017-01-01
Supplement: c7ra03254d1.pdf [file c7ra03254d1.pdf]

# **A Ni-containing Decaniobate Incorporating Organic Ligands: Synthesis, Structure, and Catalytic for Allylic Alcohol Epoxidation**

Li Li, Yanjun Niu, Kaili Dong, Pengtao Ma, Chao Zhang, Jingyang Niu\* and Jingping Wang\*

Henan Key Laboratory of Polyoxometalate Chemistry, Institute of Molecular and Crystal Engineering, College of Chemistry and Chemical Engineering, Henan University, Kaifeng 475004, Henan, China. E-mail: jyniu@henu.edu.cn, jpwang@henu.edu.cn; Fax: (+86) 371-23886876.

## **CONTENTS**

**Section 1 Bond valence sum calculations of O and Ni**

**Section 2 Additional Structural Figures**

**Section 3 Additional measurements**

**Section 4 Mass spectrometric study of compound 1**

**Section 5 Magnetic Properties of compound 1**

**Section 6 Catalytic properties**

## 1. Bond valence sum calculations of O and Ni

**Table S1** The bond valence sum calculations of all the oxygen atoms on polyanion **1**

| Atom  | Bond valence | Atom  | Bond valence |
|-------|--------------|-------|--------------|
| O(1)  | 1.48         | O(2)  | 1.45         |
| O(3)  | 1.45         | O(4)  | 1.45         |
| O(5)  | 1.77         | O(6)  | 1.46         |
| O(7)  | 1.83         | O(8)  | 1.80         |
| O(9)  | 1.74         | O(10) | 1.72         |
| O(11) | 1.95         | O(12) | 1.69         |
| O(13) | 1.75         | O(14) | 1.81         |
| O(15) | 1.87         | O(16) | 1.88         |

**Table S2** The bond valence sum calculations of all the Ni atoms in polyanion **1**

| Bond                      | Bond length | Bond Valence | Valence Sum                |
|---------------------------|-------------|--------------|----------------------------|
| Ni(1)–O(13)               | 2.012       | 0.380        | $\Sigma(\text{Ni1})=1.961$ |
| Ni(1)–O(13 <sup>1</sup> ) | 2.012       | 0.380        |                            |
| Ni(1)–O(15)               | 2.092       | 0.306        |                            |
| Ni(1)–O(15 <sup>1</sup> ) | 2.091       | 0.307        |                            |
| Ni(1)–O(16)               | 2.107       | 0.294        |                            |
| Ni(1)–O(16 <sup>1</sup> ) | 2.107       | 0.294        |                            |
| Ni(2)–O(11 <sup>1</sup> ) | 2.031       | 0.361        | $\Sigma(\text{Ni2})=2.103$ |
| Ni(2)–O(14)               | 2.039       | 0.353        |                            |
| Ni(2)–O(15)               | 2.132       | 0.274        |                            |
| Ni(2)–O(16)               | 2.136       | 0.272        |                            |
| Ni(2)–N(1)                | 2.061       | 0.431        |                            |
| Ni(2)–N(2)                | 2.078       | 0.412        |                            |

## 2. Additional Structural Figures

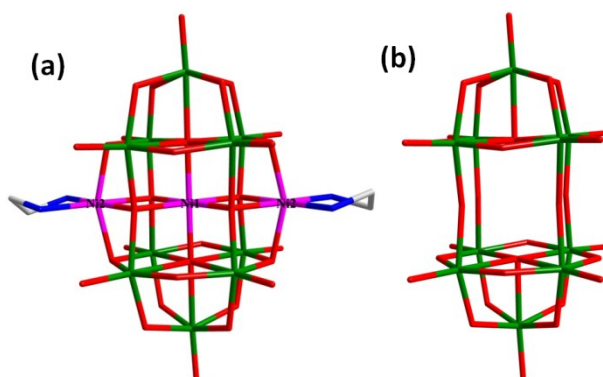

**Fig. S1** (a) the structure of polyanion **1**; (b) the structure of polyanion {Nb<sub>10</sub>} or {W<sub>10</sub>}

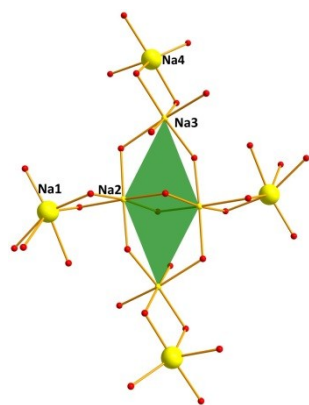

Fig. S2 Ball-and-stick representation of the  $\{Na_8\}$  unit, Colour code: Na (yellow) and O (red).

### 3. Additional measurements

#### 3.1 XRD

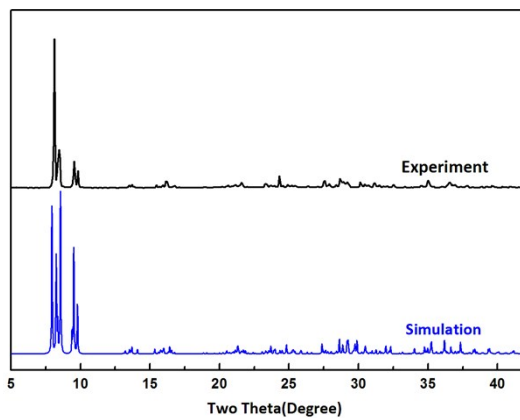

Fig. S3 Comparison of the simulated and experimental XRPD patterns

#### 3.2 IR spectra

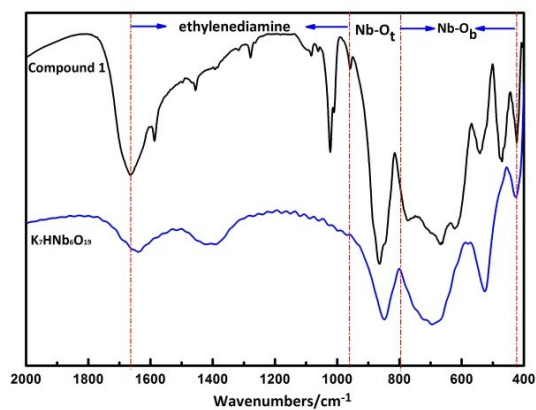

Fig. S4 The comparison of IR curves (black: compound 1; blue:  $K_7HNNb_6O_{19} \cdot 13H_2O$ )

### 3.3 UV-vis spectra

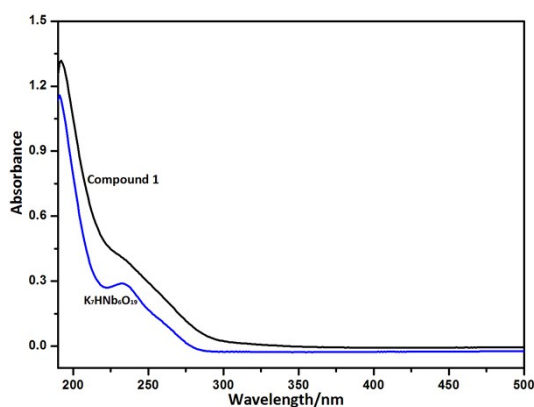

Fig. S5 The comparison of UV-vis curves (**black**: compound **1**; **blue**: K<sub>7</sub>HNb<sub>6</sub>O<sub>19</sub>·13H<sub>2</sub>O)

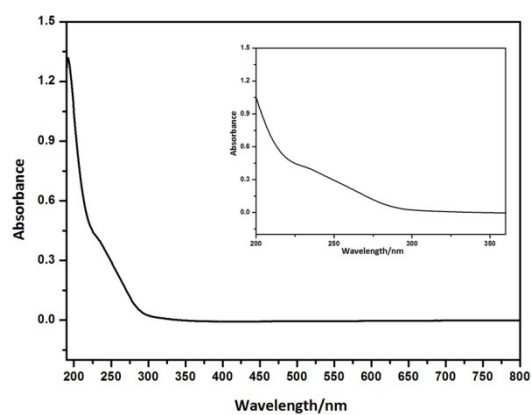

Fig. S6 The UV-vis spectra of compound **1** in the different range (**outside**: in the range of 190 to 800 nm; **inside**: in the range of 200 to 360nm.)

### 4. Mass spectrometric study of compound 1

Herein, ESI-MS data was obtained on AB SCIEX Triple TOF 4600 equipped with a syringe pump for direct source injection, with a Collision Energy (V) of -5, Declustering Potential (V) of -10 and an injection rate of 10  $\mu$ L/min.

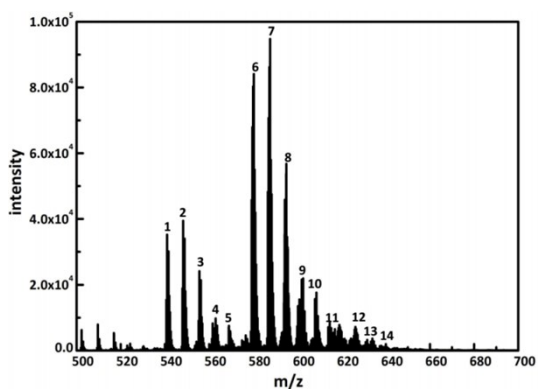

Fig. S7 The ESI mass spectrum of {Ni[Ni(en)]<sub>2</sub>Nb<sub>10</sub>O<sub>32</sub>} around m/z 587.95. Number correspond to peaks in table S3.

**Table S3** Detailed assignment of mass spectral data around  $m/z$  587.95

| Formula                                                                                                | $m/z$ (calcd) | $m/z$ (found) | Peak Number |
|--------------------------------------------------------------------------------------------------------|---------------|---------------|-------------|
| $[\text{Ni}_3\text{Nb}_{10}\text{O}_{32}\text{H}_5]^{3-}$                                              | 540.72        | 540.95        | 1           |
| $[\text{Ni}_3\text{Nb}_{10}\text{O}_{32}\text{NaH}_4]^{3-}$                                            | 548.05        | 548.28        | 2           |
| $[\text{Ni}_3\text{Nb}_{10}\text{O}_{32}\text{Na}_2\text{H}_3]^{3-}$                                   | 555.38        | 555.61        | 3           |
| $[\text{Ni}_3\text{Nb}_{10}\text{O}_{32}\text{Na}_3\text{H}_2]^{3-}$                                   | 562.70        | 562.94        | 4           |
| $[\text{Ni}_3\text{Nb}_{10}\text{O}_{32}\text{Na}_4\text{H}]^{3-}$                                     | 570.03        | 570.28        | 5           |
| $\{\text{Ni}[\text{Ni}(\text{en})]_2\text{Nb}_{10}\text{O}_{32}\text{H}_5\}^{3-}$                      | 580.96        | 580.79        | 6           |
| $\{\text{Ni}[\text{Ni}(\text{en})]_2\text{Nb}_{10}\text{O}_{32}\text{NaH}_4\}^{3-}$                    | 587.95        | 588.11        | 7           |
| $\{\text{Ni}[\text{Ni}(\text{en})]_2\text{Nb}_{10}\text{O}_{32}\text{Na}_2\text{H}_3\}^{3-}$           | 595.61        | 595.44        | 8           |
| $\{\text{Ni}[\text{Ni}(\text{en})]_2\text{Nb}_{10}\text{O}_{32}\text{Na}_3\text{H}_2\}^{3-}$           | 602.61        | 602.77        | 9           |
| $\{\text{Ni}[\text{Ni}(\text{en})]_2\text{Nb}_{10}\text{O}_{32}\text{Na}_4\text{H}\}^{3-}$             | 610.10        | 609.94        | 10          |
| $\{\text{Ni}[\text{Ni}(\text{en})]_2\text{Nb}_{10}\text{O}_{32}\text{Na}_5\}^{3-}$                     | 617.42        | 617.30        | 11          |
| $\{\text{Ni}[\text{Ni}(\text{en})]_2\text{Nb}_{10}\text{O}_{32}\text{Na}_5(\text{H}_2\text{O})\}^{3-}$ | 623.43        | 623.63        | 12          |
| $\{\text{Ni}[\text{Ni}(\text{en})]_2\text{Nb}_{10}\text{O}_{32}\text{Na}_5(\text{H}_2\text{O})_2\}^3$  | 629.43        | 629.63        | 13          |
| $\{\text{Ni}[\text{Ni}(\text{en})]_2\text{Nb}_{10}\text{O}_{32}\text{Na}_5(\text{H}_2\text{O})_3\}^3$  | 635.44        | 635.28        | 14          |

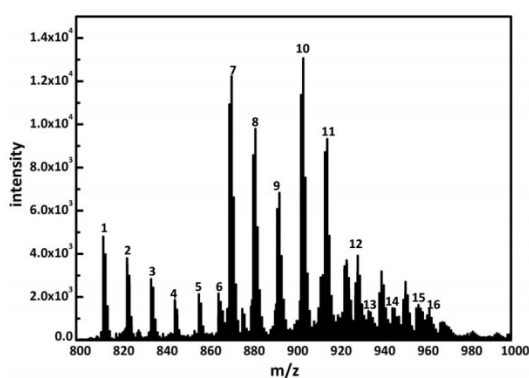**Fig. S8** The ESI mass spectrum of  $\{\text{Ni}[\text{Ni}(\text{en})]_2\text{Nb}_{10}\text{O}_{32}\}$  around  $m/z$  904.45. Number correspond to peaks in table S4.

**Table S4** Detailed assignment of mass spectral data around  $m/z$  904.45

| Formula                                                                                                  | $m/z$ (calcd) | $m/z$ (found) | Peak Number |
|----------------------------------------------------------------------------------------------------------|---------------|---------------|-------------|
| $[\text{Ni}_3\text{Nb}_{10}\text{O}_{32}\text{H}_6]^{2-}$                                                | 811.59        | 811.97        | 1           |
| $[\text{Ni}_3\text{Nb}_{10}\text{O}_{32}\text{NaH}_5]^{2-}$                                              | 822.58        | 822.97        | 2           |
| $[\text{Ni}_3\text{Nb}_{10}\text{O}_{32}\text{Na}_2\text{H}_4]^{2-}$                                     | 833.57        | 833.95        | 3           |
| $[\text{Ni}_3\text{Nb}_{10}\text{O}_{32}\text{Na}_3\text{H}_3]^{2-}$                                     | 844.56        | 844.95        | 4           |
| $[\text{Ni}_3\text{Nb}_{10}\text{O}_{32}\text{Na}_4\text{H}_2]^{2-}$                                     | 855.55        | 855.95        | 5           |
| $[\text{Ni}_3\text{Nb}_{10}\text{O}_{32}\text{Na}_5\text{H}]^{2-}$                                       | 866.54        | 866.45        | 6           |
| $\{\text{Ni}[\text{Ni}(\text{en})]_2\text{Nb}_{10}\text{O}_{32}\text{H}_6\}^{2-}$                        | 871.47        | 871.68        | 7           |
| $\{\text{Ni}[\text{Ni}(\text{en})]_2\text{Nb}_{10}\text{O}_{32}\text{NaH}_5\}^{2-}$                      | 882.46        | 882.68        | 8           |
| $\{\text{Ni}[\text{Ni}(\text{en})]_2\text{Nb}_{10}\text{O}_{32}\text{Na}_2\text{H}_4\}^{2-}$             | 893.45        | 893.67        | 9           |
| $\{\text{Ni}[\text{Ni}(\text{en})]_2\text{Nb}_{10}\text{O}_{32}\text{Na}_3\text{H}_3\}^{2-}$             | 904.45        | 904.66        | 10          |
| $\{\text{Ni}[\text{Ni}(\text{en})]_2\text{Nb}_{10}\text{O}_{32}\text{Na}_4\text{H}_2\}^{2-}$             | 915.44        | 915.65        | 11          |
| $\{\text{Ni}[\text{Ni}(\text{en})]_2\text{Nb}_{10}\text{O}_{32}\text{Na}_5\text{H}\}^{2-}$               | 926.64        | 926.44        | 12          |
| $\{\text{Ni}[\text{Ni}(\text{en})]_2\text{Nb}_{10}\text{O}_{32}\text{Na}_6\}^{2-}$                       | 937.63        | 937.43        | 13          |
| $\{\text{Ni}[\text{Ni}(\text{en})]_2\text{Nb}_{10}\text{O}_{32}\text{Na}_6(\text{H}_2\text{O})\}^{2-}$   | 946.64        | 946.44        | 14          |
| $\{\text{Ni}[\text{Ni}(\text{en})]_2\text{Nb}_{10}\text{O}_{32}\text{Na}_6(\text{H}_2\text{O})_2\}^{2-}$ | 955.65        | 955.96        | 15          |
| $\{\text{Ni}[\text{Ni}(\text{en})]_2\text{Nb}_{10}\text{O}_{32}\text{Na}_6(\text{H}_2\text{O})_3\}^{2-}$ | 964.66        | 964.44        | 16          |

## 5. Magnetic Properties of compound 1

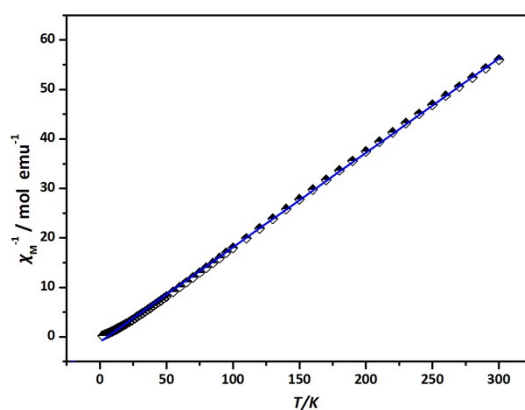**Fig. S9** The plots of  $\chi_M^{-1}$  versus T in the range of 1.8–300 K.

## 6. Catalytic properties

**Table S5** Epoxidation of allylic alcohols with Catalyst 1

| Entry          | Substrate                                                                         | Product <sup>c</sup>                                                              | by-product                                                                                                                                                             |
|----------------|-----------------------------------------------------------------------------------|-----------------------------------------------------------------------------------|------------------------------------------------------------------------------------------------------------------------------------------------------------------------|
| 1 <sup>a</sup> | 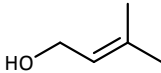 |  |                                                                                      |
| 2 <sup>b</sup> |  |  |                                                                                      |
| 3              |  |  |   |
| 4              |  |  |   |

<sup>a</sup>Reaction conditions for the entry 1: catalyst (12  $\mu$ mol), substrate (5 mmol) and H<sub>2</sub>O (3 mL) at 25 °C. <sup>b</sup>Reaction conditions for the entries 2 to 4: catalyst (12  $\mu$ mol), substrate (5 mmol) and H<sub>2</sub>O (3 mL) at 35 °C. <sup>c</sup>The products and by-products were identified by GC-MS with dodecane as an internal standard.

**Table S6** Epoxidation of 3-Methyl-2-buten-1-ol with different catalysts<sup>a</sup>

| Entry          | Catalyst                                        | Substrate                                                                           | Product                                                                              | Con. <sup>c</sup> (%) | Sel.(%) |
|----------------|-------------------------------------------------|-------------------------------------------------------------------------------------|--------------------------------------------------------------------------------------|-----------------------|---------|
| 1 <sup>b</sup> | /                                               |                                                                                     |                                                                                      | 5                     | 60      |
| 2              | Ni(NO <sub>3</sub> ) <sub>2</sub>               | 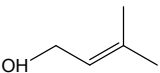 |  | 8                     | 56      |
| 3              | K <sub>7</sub> HNB <sub>6</sub> O <sub>19</sub> |  |  | 95                    | 91      |
| 4              | Compound 1                                      |                                                                                     |                                                                                      | 98                    | 94      |

<sup>a</sup>Reaction conditions for the entries 1 to 4: catalyst (12  $\mu$ mol), substrate (5 mmol) and H<sub>2</sub>O (3 mL) at 25 °C. <sup>b</sup>Blank experiment. The reaction was carried out without catalyst. <sup>c</sup>Conversion determined by using GC with dodecane as an internal standard. The products were identified by GC-MS.

**Table S7** The conversion and selectivity of epoxidation of 3-Methyl-2-buten-1-ol carried out with the recovered catalyst and the solution at the end of the first run

| Entry          | Substrate                                                                           | Product                                                                             | Con. <sup>d</sup> (%) | Sel.(%) |
|----------------|-------------------------------------------------------------------------------------|-------------------------------------------------------------------------------------|-----------------------|---------|
| 1 <sup>a</sup> | 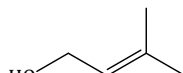 |  | 98                    | 94      |
| 2 <sup>b</sup> |  |  | 8                     | 73      |
| 3 <sup>c</sup> |  |  | 89                    | 92      |

<sup>a</sup>Reaction conditions : catalyst (12  $\mu$ mol), substrate (5 mmol), 30% H<sub>2</sub>O<sub>2</sub> (8 mmol) and H<sub>2</sub>O (3 mL) at 25 °C, 5 minutes. <sup>b</sup>Recovered catalyst. <sup>c</sup>Solution at the end of the first run. <sup>d</sup>Conversion determined by using GC with dodecane as an internal standard. The products were identified by GC-MS.

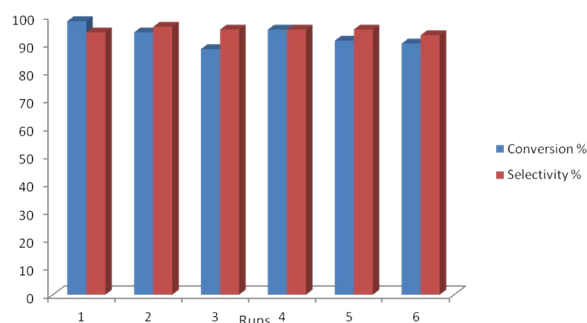

**Fig. S10** Recycling of compound 1 catalytic system for the epoxidation of 3-Methyl-2-buten-1-ol.

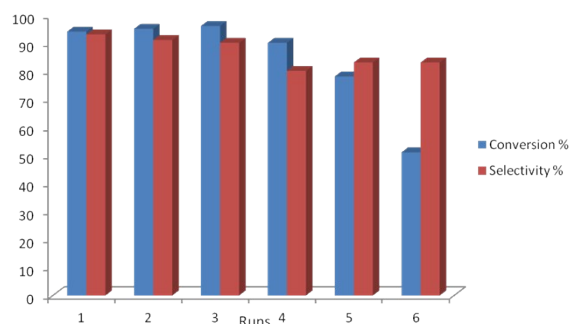

**Fig. S11** Recycling of  $K_7HNB_6O_{19} \cdot 13H_2O$  catalytic system for the epoxidation of 3-Methyl-2-buten-1-ol.

**Table S8** Epoxidation of various allylic alcohols with  $H_2O_2$  in water catalyzed by  $K_7HNB_6O_{19} \cdot 13H_2O$

| Entry          | Substrate | Product | 30% $H_2O_2$ (mmol) | Time (min) | Con. <sup>b</sup> (%) | Sel. (%) |
|----------------|-----------|---------|---------------------|------------|-----------------------|----------|
| 1 <sup>a</sup> |           |         | 8                   | 5          | 95                    | 91       |
| 2              |           |         | 8                   | 60         | 52                    | 91       |
| 3              |           |         | 8                   | 60         | 64                    | 96       |
| 4              |           |         | 8                   | 60         | 97                    | 96       |

<sup>a</sup> Reaction conditions for the entries 1 to 4: catalyst (12  $\mu$ mol), substrate (5 mmol), 30% $H_2O_2$  (8 mmol) and  $H_2O$  (3 mL) at 25  $^{\circ}C$ . <sup>b</sup> Conversion determined by using GC with dodecane as an internal standard. The products were identified by GC-MS

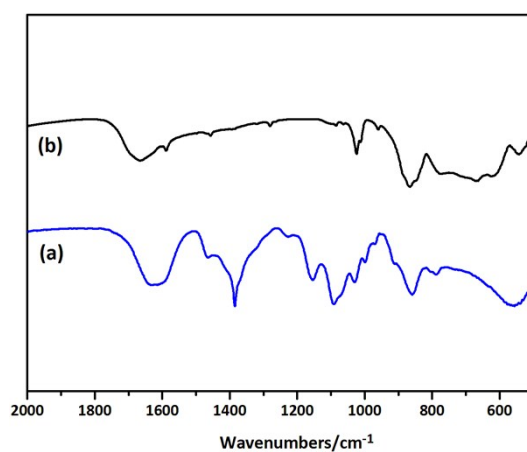

**Fig. S12** IR spectra of the catalyst before and after the reaction: (a) the used catalyst; (b) the fresh catalyst.



**Table S9** The efficiency of hydrogen peroxide

| Reaction       | Substrate                                                                         | H <sub>2</sub> O <sub>2</sub> efficiency <sup>c</sup> of Compound <b>1</b><br>(%) | H <sub>2</sub> O <sub>2</sub> efficiency of K <sub>7</sub> HNb <sub>6</sub> O <sub>19</sub> ·13H <sub>2</sub> O (%) |
|----------------|-----------------------------------------------------------------------------------|-----------------------------------------------------------------------------------|---------------------------------------------------------------------------------------------------------------------|
| 1 <sup>a</sup> | 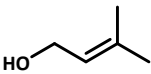 | 89                                                                                | 87                                                                                                                  |
| 2 <sup>b</sup> |  | 42                                                                                | 55                                                                                                                  |
| 3              |  | 51                                                                                | 77.3                                                                                                                |
| 4              |  | 69                                                                                | 90                                                                                                                  |

<sup>a</sup> Reaction conditions for the entry 1: catalyst (12 μmol), substrate (5 mmol), 30% H<sub>2</sub>O<sub>2</sub> (8 mmol) and H<sub>2</sub>O (3 mL) at 25 °C, 5 min. <sup>b</sup> Reaction conditions for the entries 2 to 4: catalyst (12 μmol), substrate (5 mmol), 30% H<sub>2</sub>O<sub>2</sub> (8 mmol) and H<sub>2</sub>O (3 mL) at 35 °C, 60 min. <sup>c</sup> Residual H<sub>2</sub>O<sub>2</sub> after the reaction was estimated by means of the iodometric method. H<sub>2</sub>O<sub>2</sub> efficiency (%) = products (mol) / consumed H<sub>2</sub>O<sub>2</sub> (mol) × 100.
